# Supplementary material for: Antitumor Effects of a Sesquiterpene Derivative from Marine Sponge in Human Breast Cancer Cells
Source: MDPI journal article supplement (doi:10.3390/md19050244), 2021-04-26

## **Supporting Information**

### **Antitumor Effects of a Sesquiterpene Derivative from Marine Sponge in Human**

#### **Breast Cancer Cells**

**Li-Yuan Bai <sup>1,2,†</sup>, Jui-Hsin Su <sup>3,†</sup>, Chang-Fang Chiu <sup>1,4</sup>, Wei-Yu Lin <sup>5</sup>, Jing-Lan Hu <sup>1</sup>, Chia-Hsien Feng <sup>6</sup>, Chih-Wen Shu <sup>7</sup>, and Jing-Ru Weng <sup>8,9,10,\*</sup>**

<sup>1</sup>Division of Hematology and Oncology, Department of Internal Medicine, China Medical University Hospital, Taichung 40447, Taiwan

<sup>2</sup>College of Medicine, China Medical University, Taichung 40402, Taiwan

<sup>3</sup>National Museum of Marine Biology and Aquarium, Pingtung 94450, Taiwan

<sup>4</sup>Cancer Center, China Medical University Hospital, Taichung 40415, Taiwan

<sup>5</sup>Department of Pharmacy, Kinmen Hospital, the Ministry of Health and Welfare, Kinmen 89142, Taiwan

<sup>6</sup>Department of Fragrance and Cosmetic Science, College of Pharmacy, Kaohsiung Medical University, Kaohsiung 80708, Taiwan

<sup>7</sup>Institute of BioPharmaceutical Sciences, National Sun Yat-sen University, Kaohsiung 80424, Taiwan

<sup>8</sup>Department of Marine Biotechnology and Resources, National Sun Yat-sen University, Kaohsiung 80424, Taiwan

<sup>9</sup>Doctoral Degree Program in Marine Biotechnology, National Sun Yat-sen  
University, Kaohsiung 80424, Taiwan

<sup>10</sup>Graduate Institute of Natural Products, College of Pharmacy, Kaohsiung Medical  
University, Kaohsiung 80708, Taiwan

| Figure                                                                                                                                                                                                                                                                                                                                                                                                                      | Page |
|-----------------------------------------------------------------------------------------------------------------------------------------------------------------------------------------------------------------------------------------------------------------------------------------------------------------------------------------------------------------------------------------------------------------------------|------|
| <p>S1      Localization analysis of (A) E-cadherin and (B) <math>\beta</math>-catenin in MCF-7 cells after ilimaquinone (5 <math>\mu</math>M) treatment. Cells were incubated with DMSO or ilimaquinone (5 <math>\mu</math>M) for 48 h, then washed three with PBS, fixed with 4% paraformaldehyde (PFA) and immunostained by antibodies against E-cadherin and <math>\beta</math>-catenin. Bar: 100 <math>\mu</math>m.</p> | 4    |

**Fig. S1**

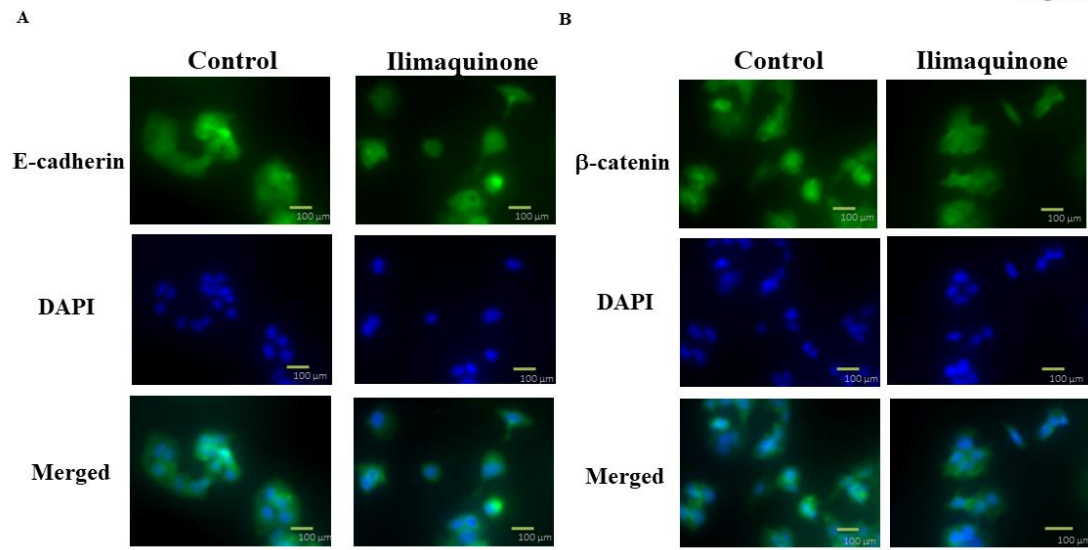

Supplement: s1 [file s1]
